# Supplementary material
Source: PubMed Central journal article supplement (PMC300733)

|                    |             |            |             |             |             |            |            |     |
|--------------------|-------------|------------|-------------|-------------|-------------|------------|------------|-----|
|                    | 1           |            |             |             |             |            |            | 70  |
| <i>rop6</i>        | ATG.....A   | GC.....    | .....       | .....G      | tgaCcaaGTT  | CATcAAGTGC | GTCACgGTgG |     |
| <i>rop7</i>        | ATG.....A   | GC.....    | .....       | .....G      | tgaCcaaGTT  | CATcAAGTGC | GTCACgGTgG |     |
| <i>rop3 (racC)</i> | ATG.....A   | GCgcggcggc | agcggcgggcg | gcbgagctcgG | tcaCcaaGTT  | CATcAAGTGC | GTCACgGTcG |     |
| <i>rop1 (racA)</i> | ATGgcgtcca  | GC.....    | .....       | .....G      | cctCctcgGTT | CATcAAGTGC | GTCACgGTcG |     |
| <i>rop8</i>        | ATGgcctcca  | GC.....    | .....       | .....G      | cctCctcgGTT | CATcAAGTGC | GTCACgGTcG |     |
| <i>rop5</i>        | ATGgcctcca  | GC.....    | .....       | .....G      | cctCccgGTT  | CATcAAGTGC | GTCACaGTgG |     |
| <i>rop4 (racD)</i> | ATG.....A   | GC.....    | .....       | .....G      | cgtCctcgGTT | CATcAAGTGC | GTCACcGTgG |     |
| <i>rop9</i>        | ATG.....A   | GC.....    | .....       | .....G      | cgtCcagGTT  | CATaAAGTGC | GTCACgGTcG |     |
| <i>rop2 (racB)</i> | ATG.....A   | GC.....    | .....       | .....G      | cgtCcagGTT  | CATaAAGTGC | GTCACgGTcG |     |
|                    | 71          |            |             |             |             |            |            | 140 |
| <i>rop6</i>        | GcGAcGGcGC  | gGTgGGcAAG | ACcTGcATGC  | TCATcTgCTA  | CACcagCAAC  | AagTTCCCCA | CgGAcTAcA  | T   |
| <i>rop7</i>        | GgGAcGGcGC  | gGTgGGcAAG | ACcTGcATGC  | TCATcTgCTA  | CACcagCAAC  | AagTTCCCCA | CgGAcTAcA  | T   |
| <i>rop3 (racC)</i> | GcGAtGGgGC  | cGTcGGgAAG | ACcTGcATGC  | TCATcTgCTA  | CACcagCAAC  | AagTTCCCCA | CgGAcTAcA  | T   |
| <i>rop1 (racA)</i> | GcGAcGGtGC  | cGTgGGcAAG | ACaTgTATGC  | TCATcTgCTA  | CACcagCAAC  | AagTTCCCCA | CtGAcTAcA  | T   |
| <i>rop8</i>        | GcGAcGGtGC  | cGTgGGcAAG | ACaTgTATGC  | TCATcTgCTA  | CACcagCAAC  | AagTTCCCCA | CtGAcTAcA  | T   |
| <i>rop5</i>        | GgGAcGGcGC  | cGTgGGaAAG | ACcTGcATGC  | TCATcTgCTA  | CACcagCAAC  | AagTTCCCCA | CtGAcTAcA  | T   |
| <i>rop4 (racD)</i> | GgGAcGGtGC  | cGTcGGaAAG | ACcTGcATGC  | TCATcTcCTA  | CACcagCAAC  | AagTTCCCCA | CtGAcTAcA  | T   |
| <i>rop9</i>        | GgGAcGGcGC  | cGTcGGcAAG | ACcTGcATGC  | TCATtTcCTA  | CACcagCAAC  | AccTTCCCCA | CcGAcTAcA  | T   |
| <i>rop2 (racB)</i> | GgGAcGGcGC  | cGTcGGcAAG | ACcTGcATGC  | TCATcTcCTA  | CACcagCAAC  | AccTTCCCCA | CcGAcTAcA  | T   |
|                    | 141         |            |             |             |             |            |            | 210 |
| <i>rop6</i>        | cCCcACgGTg  | TTcGAcAAcT | TCAGcGcAA   | cGTctccGTg  | GacGGcAgcA  | tcGTcAAcct | gGGcCTcTGG |     |
| <i>rop7</i>        | cCCcACgGTg  | TTcGAcAAcT | TCAGcGcAA   | cGTctccGTg  | GacGGcAgcA  | tcGTcAAcct | gGGcCTcTGG |     |
| <i>rop3 (racC)</i> | cCCcACgGTg  | TTcGAcAAcT | TCAGcGcAA   | tGTctccGTg  | GgtGGgAgcA  | tcGTcAAcct | gGGcCTcTGG |     |
| <i>rop1 (racA)</i> | aCCtACgGTg  | TTcGAcAAcT | TCAGtGcAA   | tGTgattGTg  | GatGGcAcca  | ctGTgAattT | gGGcCTtTGG |     |
| <i>rop8</i>        | aCCcACgGTg  | TTcGAcAAcT | TCAGtGcAA   | tGTgattGTg  | GatGGcAcca  | cgGTgAattT | gGGcCTgTGG |     |
| <i>rop5</i>        | aCCcACgGTg  | TTcGAcAAcT | TCAGtGcAA   | cGTggtatGTg | GacGGtAcca  | cgGTgAattT | gGGcCTtTGG |     |
| <i>rop4 (racD)</i> | tCCcACtGTg  | TTcGAcAAcT | TCAGtGcAA   | tGTtgtgGtT  | GacGGgAgcA  | ctGTcAAcct | gGGcCTgTGG |     |
| <i>rop9</i>        | tCCgACgGTg  | TTtGAcAAcT | TCAGtGcAA   | cGTtgtgGtT  | GatGGtAaca  | ctGTcAAcct | cGGcCTcTGG |     |
| <i>rop2 (racB)</i> | tCCgACaGTg  | TTtGAcAAcT | TCAGtGcAA   | cGTtgtgGtT  | GatGGtAata  | ctGTcAAcct | cGGcCTcTGG |     |
|                    | 211         |            |             |             |             |            |            | 280 |
| <i>rop6</i>        | GAcACcGCgG  | GgCAaGAgGA | cTACAgcaGg  | cTgcGgCCgc  | TgAGCTAcag  | gGGcGCgGac | GTgTTcgTgC |     |
| <i>rop7</i>        | GAcACTGCaG  | GaCAaGAgGA | cTACAgcaGg  | tTgcGgCCac  | TgAGCTAcag  | gGGcGCgGac | GTgTTcgTgC |     |
| <i>rop3 (racC)</i> | GAcACgGCaG  | GcCAgGAgGA | tTACAgcaGg  | tTgaGgCCtc  | TcAGCTAcag  | gGGtGCtGat | GTgTTcaTcC |     |
| <i>rop1 (racA)</i> | GAtAcCGcTg  | GgCAgGAaGA | tTACAaccGc  | cTgaGgCCtc  | TaAGCTAccg  | aGGtGCaGat | GTtTTcgTgC |     |
| <i>rop8</i>        | GAtAcCGcCaG | GgCAgGAaGA | tTACAaccGc  | cTgaGgCCtc  | TaAGCTAccg  | tGGtGCaGat | GTtTTcgTgC |     |
| <i>rop5</i>        | GAtAcTGCaG  | GgCAgGAaGA | tTACAacaGa  | cTgaGgCCac  | TgAGCTAccg  | cGgaGCaGat | GTgTTcgTgC |     |
| <i>rop4 (racD)</i> | GAtAcAGcCaG | GaCAaGAaGA | tTACAataGa  | cTgcGtCCgt  | TgAGCTAtcG  | tGGtGCtGat | GTtTTtTgC  |     |
| <i>rop9</i>        | GAcACTGCaG  | GtCAaGAgGA | tTACAacaGa  | cTgaGcCCac  | TgAGCTAtcG  | tGgaGCtGat | GTtTTtTtC  |     |
| <i>rop2 (racB)</i> | GAcACTGCaG  | GtCAaGAgGA | tTACAacaGa  | cTgaGcCCac  | TgAGCTAtcG  | tGgaGCtGat | GTtTTtTtC  |     |
|                    | 281         |            |             |             |             |            |            | 350 |
| <i>rop6</i>        | TggCcTtTC   | ccTgaTcAgc | aggGcAGCT   | AcGAGAAcgt  | tcttAAGAAG  | TGGgTgCCaG | AgcTtcgcag |     |
| <i>rop7</i>        | TggCcTtTC   | ctTgaTcAgc | aggGcAGCT   | AtGAGAAcgt  | ccttAAGAAG  | TGGgTgCCaG | AgcTtcgcag |     |
| <i>rop3 (racC)</i> | TctCcTtTC   | ccTggTcAgc | aggGcAGCT   | AtGAGAAcgt  | cctgAAGAAG  | TGGaTgCCaG | AgcTtcgcag |     |
| <i>rop1 (racA)</i> | TtgCaTtTC   | acTtgTgAgc | cgaGctAGCT  | AtGAGAataT  | catgAAGAAG  | TGGaTaCCaG | AgcTtcaaca |     |
| <i>rop8</i>        | TtgCaTtTC   | acTtgTgAgc | cgaGctAGCT  | AtGAGAataT  | catgAAGAAG  | TGGaTaCCgG | AgcTtcaaca |     |
| <i>rop5</i>        | TcgCcTtTC   | gcTtgTcAgc | cgaGctAGCT  | AcGAGAAcgt  | tatgAAGAAG  | TGGcTaCCgG | AgcTtcaaca |     |
| <i>rop4 (racD)</i> | TcgCcTtTC   | tcTtaTcAgc | aaaGcAGCT   | AtGAGAAcgt  | ctctAAGAAG  | TGGgTtCCtG | AatTaaggca |     |
| <i>rop9</i>        | TggCcTtTC   | acTgaTcAgc | aaaGcAGCT   | AtGAGAAcgt  | ttcgAAGAAG  | TGGaTaCCtG | AacTgaagca |     |
| <i>rop2 (racB)</i> | TggCcTtTC   | acTgaTcAgc | aagGcAGCT   | AtGAGAAcgt  | ttcgAAGAAG  | TGGaTaCCtG | AacTgaagca |     |
|                    | 351         |            |             |             |             |            |            | 420 |
| <i>rop6</i>        | aTtcgCgCcc  | aacGTcCCgg | TcgTtcTtGt  | tGGgACcAAG  | tTaGATCTcC  | GcGAccAcAg | agccTaccTc |     |
| <i>rop7</i>        | aTtcgCgCcc  | gacGTcCCgg | TcgTtcTtGt  | cGGgACcAAG  | tTaGATCTcC  | GtGAccAcAg | ggccTaccTt |     |
| <i>rop3 (racC)</i> | aTtttCaCct  | actGTtCCtg | TagTtcTtGt  | tGgAACCaaa  | cTaGATCTcC  | GtGAagAcAg | atctTaccTt |     |
| <i>rop1 (racA)</i> | tTatgCaCct  | gggGTgCCcg | TtgTttTgGc  | aGgcACaAAA  | tTgGATCTtC  | GtGAagAcAa | gcacTactTg |     |
| <i>rop8</i>        | tTatgCaCct  | gggGTgCCcg | TtgTgtTgGt  | aGgcACaAAA  | tTtGATCTtC  | GtGAagAcAa | gcacTactTg |     |
| <i>rop5</i>        | tTatgCaCcg  | gggGTtCCca | TagTgtTgGt  | cGgACtAAA   | tTgGATCTtC  | GtGAagAcAg | gcacTactTg |     |
| <i>rop4 (racD)</i> | cTatgCtCct  | ggcGTgCCca | TaaTtcTtGt  | tGGgACaAAA  | cTtGATCTgC  | GtGatgAtAa | gcagTtttTt |     |
| <i>rop9</i>        | tTatgCaCct  | gggGTgCCca | TaaTtcTtGt  | aGgGACaAAG  | cTtGATCTtC  | GaGatgAcAa | gcagTtctTt |     |
| <i>rop2 (racB)</i> | tTatgCaCct  | gggGTgCCca | TtaTtcTtGt  | aGgGACaAAG  | cTtGATCTtC  | GaGacgAcAa | gcagTtctTt |     |

|                    |            |             |            |            |            |            |            |
|--------------------|------------|-------------|------------|------------|------------|------------|------------|
|                    | 421        |             |            |            |            |            | 490        |
| <i>rop6</i>        | gccGACcAtc | CTGgagcttc  | agcagTcaCc | ACgGcgCAGG | GtGAgGAaCT | gaGgAagCag | ATcGGcGCtg |
| <i>rop7</i>        | gctGAcCAtc | CTGgagcgtc  | gacgaTcaCg | ACgGcaCAGG | GcGAaGAaCT | gaGgAggCag | ATcGGcGCtg |
| <i>rop3 (racC)</i> | gctGAcCAtt | CTGctgcttc  | catcaTctCt | ACTgaaCAGG | GaGAaGAgCT | caGgAagCag | ATaGGtGCtg |
| <i>rop1 (racA)</i> | atgGAcCAtc | CTGgattggt  | gcctgTtaCc | ACTGcaCAGG | GgGAgGAaCT | tcGtAgaCaa | ATtGGtGCta |
| <i>rop8</i>        | atgGAcCAtc | CTGggttggg  | gcctgTtaCc | ACaGcaCAaG | GgGAgGAaCT | tcGtAgaCaa | ATtGGtGCta |
| <i>rop5</i>        | gttGAcCAtc | CTGgtgceggt | acctgTtaCt | ACaGcaCAGG | GgGAgGAaCT | gcGcAagCac | ATtGGcGCaa |
| <i>rop4 (racD)</i> | gttGAtCAcc | CTGgtgctgt  | tccaaTttCc | ACTGccCAGG | GcGAaGAgCT | gaGgAagCta | ATtGGtGCtg |
| <i>rop9</i>        | gtgGAcCAtc | CTGgtgctgt  | tcctaTcaCt | ACTGctCAGG | GaGAgGAgCT | aaGaAagCaa | ATaGGcGCgc |
| <i>rop2 (racB)</i> | gtgGAcCAtc | CTGgtgctgt  | ccctaTcaCt | ACTGctCAGG | GaGAgGAgCT | aaGaAagCaa | ATaGGcGCtc |

|                    |            |            |            |             |             |            |             |
|--------------------|------------|------------|------------|-------------|-------------|------------|-------------|
|                    | 491        |            |            |             |             |            | 560         |
| <i>rop6</i>        | cggccTACAT | cGAgTGCAGT | TCcAAAaccC | AgcagAAcGT  | cAAgtctGTc  | TTcGAtaCgG | CcATcAAAaGT |
| <i>rop7</i>        | cggetTACAT | cGAgTGCAGT | TCcAAAacgC | AgcagAAatGT | cAAgtcgcGTc | TTcGAcacaG | CcATcAAAaGT |
| <i>rop3 (racC)</i> | tggcgTACAT | aGAaTGCAGc | TCaAAgAcaC | AgaggAAcGT  | aAAggctGTg  | TTcGAcacTg | CaATtAAaGT  |
| <i>rop1 (racA)</i> | tgatTACAT  | tGAaTGCAGc | TCaAAgAcaC | AgcagAAatGT | cAAagctGTg  | TTcGAtgCtG | CcATcAAgGT  |
| <i>rop8</i>        | tgatTACAT  | cGAaTGCAGT | TCgAAgAcaC | AgcagAAatGT | cAAagctGTg  | TTcGAtgCtG | CcATcAAgGT  |
| <i>rop5</i>        | cttgcTACAT | cGAaTGCAGc | TCaAAAactC | AgcagAAatGT | gAAagctGTg  | TTtGAtgCtG | CcATcAAgGT  |
| <i>rop4 (racD)</i> | ccgccTACAT | cGAaTGCAGT | TCaAAAatcC | AgcagAAcaT  | aAAagcaGTg  | TTtGAcgCaG | CaATtAAgGT  |
| <i>rop9</i>        | catacTACAT | cGAgTGCAGc | TCaAAgAccC | AactaAAcGT  | gAAgggtGTc  | TTcGAtgCgG | CgATaAAgGT  |
| <i>rop2 (racB)</i> | catacTACAT | cGAaTGCAGc | TCgAAgAccC | AactaAAcGT  | gAAgggcGTc  | TTcGAtgCgG | CgATaAAgGT  |

|                    |            |            |            |            |            |             |             |
|--------------------|------------|------------|------------|------------|------------|-------------|-------------|
|                    | 561        |            |            |            |            |             | 630         |
| <i>rop6</i>        | gGTccTtcag | CCcCCacggA | ggagggag.. | .gcagtgcct | gccaggAagA | Agaacagggcg | tggtcccgga  |
| <i>rop7</i>        | gGTccTtcag | CCcCCcgggA | ggagggag.. | .gcagcgcct | gccaggAggA | Agaacagggcg | tggtccggg   |
| <i>rop3 (racC)</i> | aGTgcTgcaa | CCaCCgaggA | gaagagaa.. | .....ggt   | accaggAagA | Aaatgaagac  | aagttcgaat  |
| <i>rop1 (racA)</i> | aGTaaTccag | CCtCCaactA | aaataagaga | aaag.....  | .....AagA  | Agaaaaaatc  | acgcaaagga  |
| <i>rop8</i>        | tGTaaTccag | CCtCCaactA | aactaagaga | aaag.....  | .....AagA  | Aaaagaaatc  | acgcaaagga  |
| <i>rop5</i>        | aGTaaTcagg | CCtCCgacgA | agcagcgaga | aaag.....  | .....AagA  | Aaaagaaaga  | acggcgagga  |
| <i>rop4 (racD)</i> | gGTtcTccag | CCaCCa...A | agcaaaagaa | gagg.....  | .....AagA  | Agaaggtg..  | .cagaagga   |
| <i>rop9</i>        | tGTgcTgcag | CCgCCt...A | aggcgaagaa | gaag.....  | .....AaaA  | Agggcgag..  | .agggggggcg |
| <i>rop2 (racB)</i> | tGTgcTgcag | CCgCCt...A | aggcgaagaa | gaag.....  | .....AaaA  | Aggtgcag..  | .agggggggcg |

|                    |            |               |            |            |            |                   |     |
|--------------------|------------|---------------|------------|------------|------------|-------------------|-----|
|                    | 631        |               |            |            |            |                   | 690 |
| <i>rop6</i>        | tgctCtaTaa | tg.....aa     | ccttgtgtgt | ggcagcacat | gtgctgctta | <b>g</b>          |     |
| <i>rop7</i>        | tgctCtaTca | tg.....aa     | cctcatgtgt | ggcagcacgt | gcgctgctta | <b>g</b>          |     |
| <i>rop3 (racC)</i> | cagtCtcTga | ga.....ag     | atacctctgt | ggaagcggat | gtttcacatc | <b>gtaa</b>       |     |
| <i>rop1 (racA)</i> | tgttCtaTga | tg.....aa     | catcttcggg | ggaagaaaaa | tgctatgctt | <b>caagtcctga</b> |     |
| <i>rop8</i>        | tgttCgaTgg | tg.....aa     | catcttatct | ggaagaaaaa | tgctatgctt | <b>caagtcctga</b> |     |
| <i>rop5</i>        | tgctCaaTat | tctgcagccg    | tatcatgcac | gcaagaagac | taggatgctt | <b>caagtga</b>    |     |
| <i>rop4 (racD)</i> | tgcaCcaTtt | tg <b>taa</b> |            |            |            |                   |     |
| <i>rop9</i>        | tgctCcaTtt | tg <b>tga</b> |            |            |            |                   |     |
| <i>rop2 (racB)</i> | tgctCcaTtt | tg <b>tga</b> |            |            |            |                   |     |





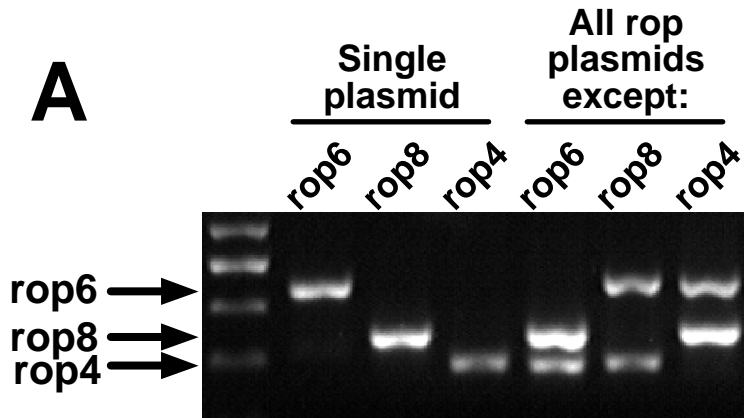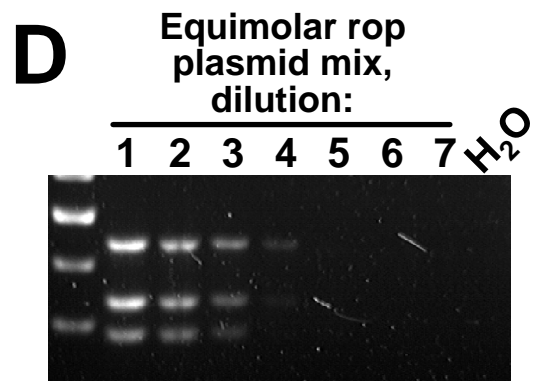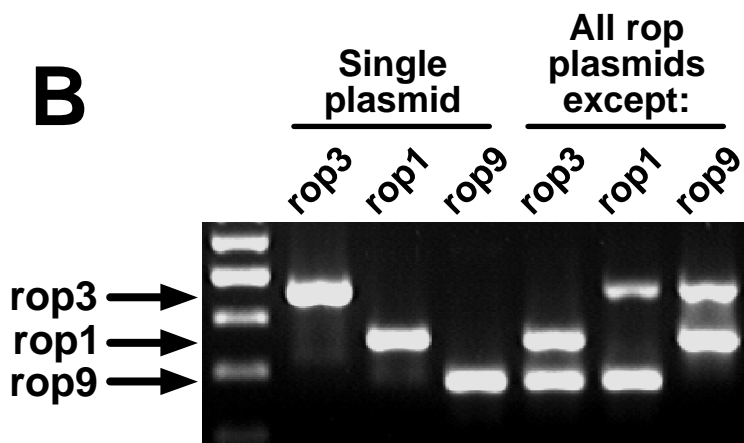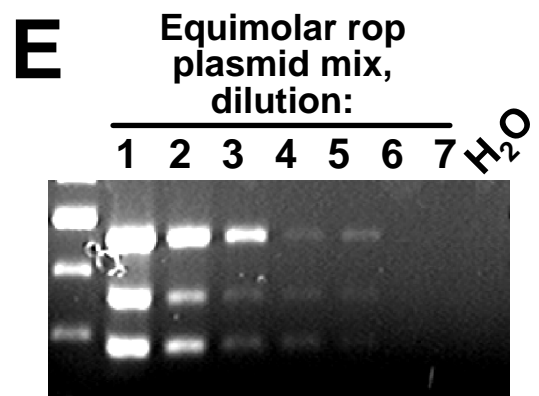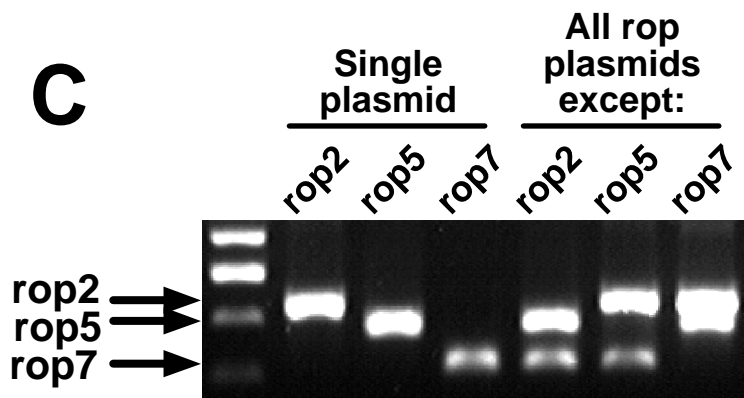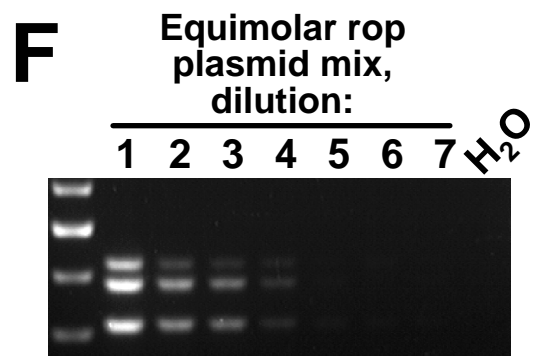

Supplement: plntphys_133_4_1791__1.pdf [file plntphys_133_4_1791__1.pdf]
